# Supplementary material
Source: PubMed Central journal article supplement (PMC2719145)
Supplement: pp.109.139204_1.pdf [file pp.109.139204_1.pdf]

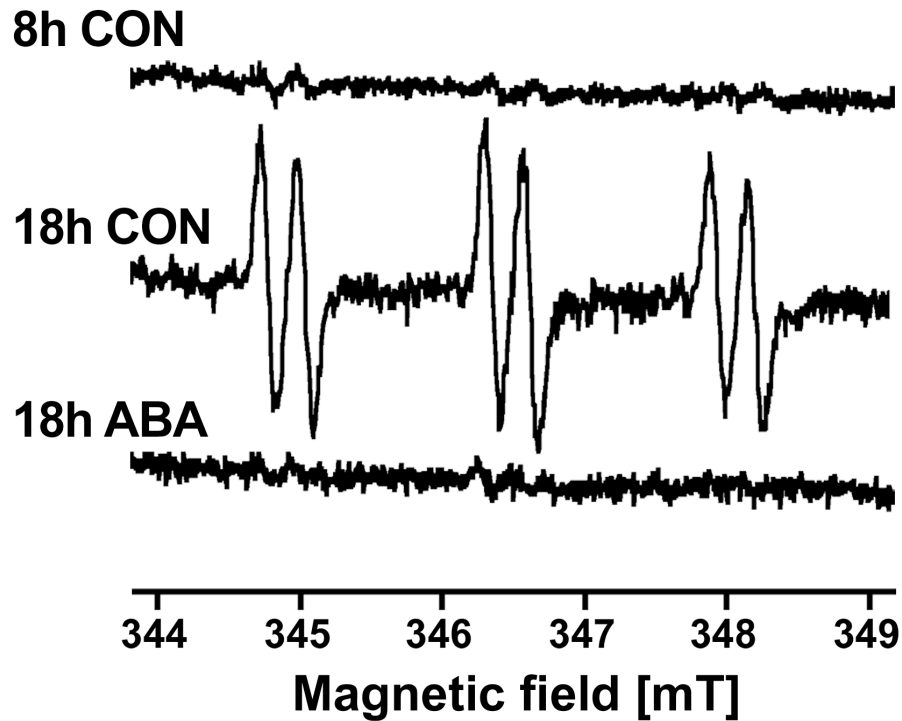**Supplemental Figure S1**

•OH generated *in vivo* in the apoplast of radicles reacted with the spin trapping system ethanol / POBN to an adduct with a characteristic hyperfine splitting pattern its electron paramagnetic resonance (EPR)-spectrum. This adduct is diagnostic of •OH formation. Representative EPR-spectra for radicles incubated for the indicated times are shown.
